# Supplementary material for: The influence of yttrium dopant on the properties of anatase nanoparticles and the performance of dye-sensitized solar cells
Source: Royal Society of Chemistry journal article supplement (doi:10.1039/c5cp01178g), 2015-01-01
Supplement: c5cp01178g1.pdf [file c5cp01178g1.pdf]

**Influence of yttrium dopant on the properties of anatase nanoparticles and the  
performance of dye-sensitized solar cells**

Bingxin Zhao, Jinshu Wang\*, Hongyi Li\*, Hong Wang, Xinjian Jia and Penglei Su

Key Laboratory of Advanced Functional Materials, College of Materials Science and  
Engineering, Beijing University of Technology, Beijing 100124, P. R. China

Reprint Author: wangjsh@bjut.edu.cn, lhy06@bjut.edu.cn

Tel & Fax: +8610-67391101

**Measurement:** The UV-Vis reflection spectra of X%Y-TiO<sub>2</sub> powder were measured by using a spectrophotometer (SHIMADZU, UV-2550) equipped with an integrating sphere setup. *IPCE* spectra were measured with monochromatic incident light of photon/cm<sup>2</sup> under 100mW/cm<sup>2</sup> white bias light in DC mode (PEC-S20, Peccell Co., Lid).

Table S1 Detail Crystallite size parameters calculated from 101, 200 and 211 diffraction peaks

| <b>Sample</b>                |            | <b>0.6%Y-<br/>TiO<sub>2</sub></b> | <b>1.8%Y-<br/>TiO<sub>2</sub></b> | <b>3%Y-<br/>TiO<sub>2</sub></b> | <b>4.2%Y-<br/>TiO<sub>2</sub></b> | <b>5.4%Y-<br/>TiO<sub>2</sub></b> |       |
|------------------------------|------------|-----------------------------------|-----------------------------------|---------------------------------|-----------------------------------|-----------------------------------|-------|
| <b>Crystallite size</b>      | <b>101</b> | 29.48                             | 27.32                             | 26.92                           | 26.31                             | 27.22                             | 26.63 |
| <b>calculated from</b>       | <b>200</b> | 29.02                             | 26.63                             | 26.95                           | 24.69                             | 26.68                             | 26.90 |
| <b>diffraction peak (nm)</b> | <b>211</b> | 26.73                             | 27.75                             | 24.67                           | 24.34                             | 24.77                             | 28.13 |

Table S2 Corresponding interplanar spacing from 101 and 200 diffraction angles of TiO<sub>2</sub> and X%Y-TiO<sub>2</sub>

| Sample     |            | TiO <sub>2</sub>           | 0.6%Y-TiO <sub>2</sub> | 1.8%Y-TiO <sub>2</sub> | 3%Y-TiO <sub>2</sub> | 4.2%Y-TiO <sub>2</sub> | 5.4%Y-TiO <sub>2</sub> |
|------------|------------|----------------------------|------------------------|------------------------|----------------------|------------------------|------------------------|
|            |            | <b>interplanar spacing</b> | <b>101</b>             | 3.525                  | 3.528                | 3.529                  | 3.530                  |
| <b>(Å)</b> | <b>200</b> | 1.897                      | 1.898                  | 1.898                  | 1.898                | 1.899                  | 1.899                  |

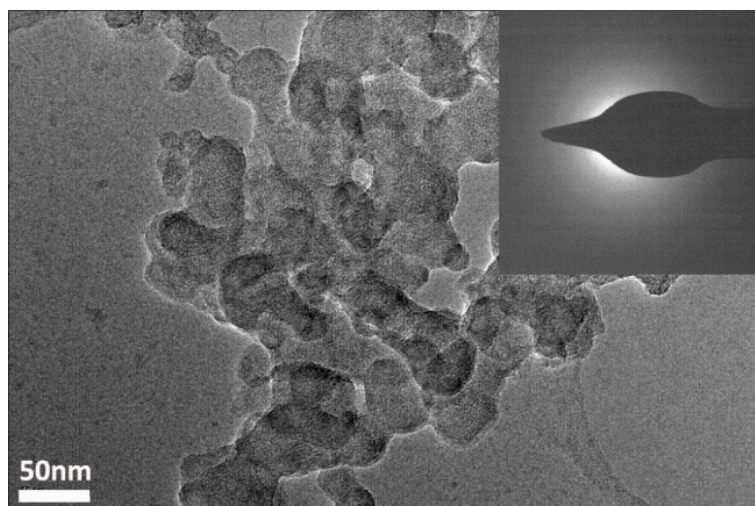

Fig. S1 TEM image of amorphous TiO<sub>2</sub>. SAED pattern from the amorphous TiO<sub>2</sub> is shown as insets.

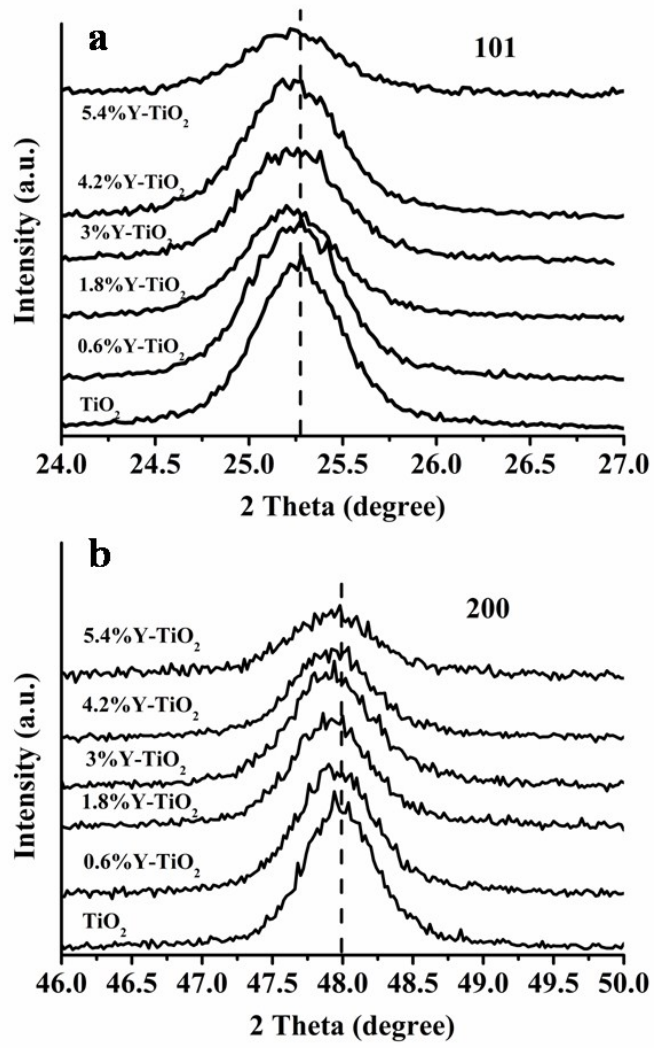

Fig. S2 XRD diffractogram of anatase peak 101 and 200

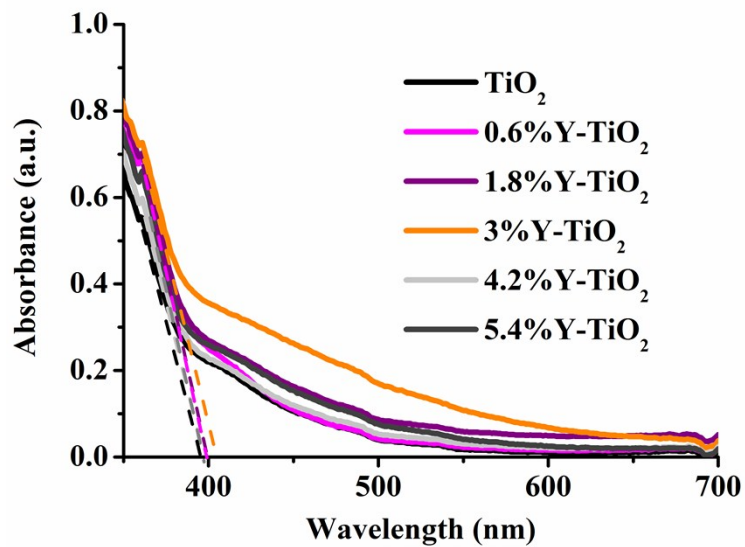

Fig. S3 UV-Vis spectra of as-prepared  $\text{TiO}_2$ , X%Y- $\text{TiO}_2$  NPs

Experimental UV-Vis spectra of as-prepared  $\text{TiO}_2$  and X%Y- $\text{TiO}_2$  are shown in Fig. S3. The absorption edge of Y-doped  $\text{TiO}_2$  is substantially red shifted to visible region. The absorption edges of as-prepared  $\text{TiO}_2$  and X%Y- $\text{TiO}_2$  appeared at 395-399 nm, corresponding band gap energies are listed in Table 1.

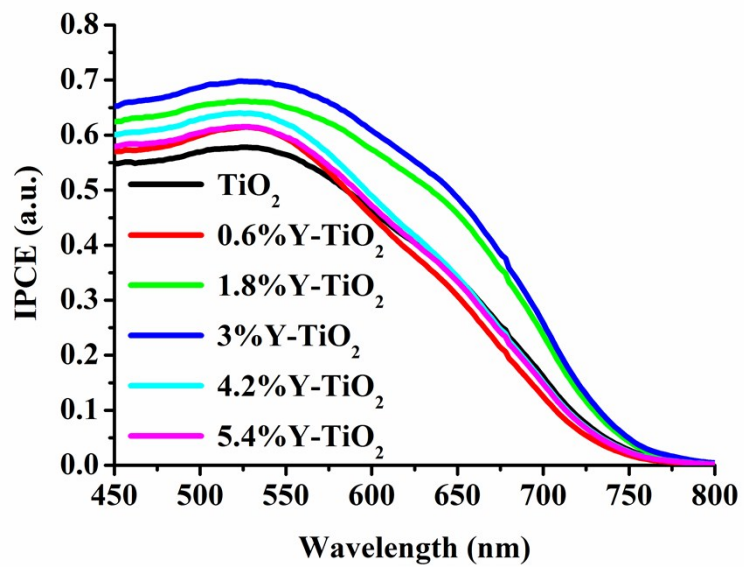

Fig. S4 IPCE spectra of TiO<sub>2</sub> and X%Y-TiO<sub>2</sub> based DSSCs
